# Supplementary material
Source: PubMed Central journal article supplement (PMC8653916)

# GlcNAc/eNOS Paper Western Blots

Full unedited gel for Figure 1D)

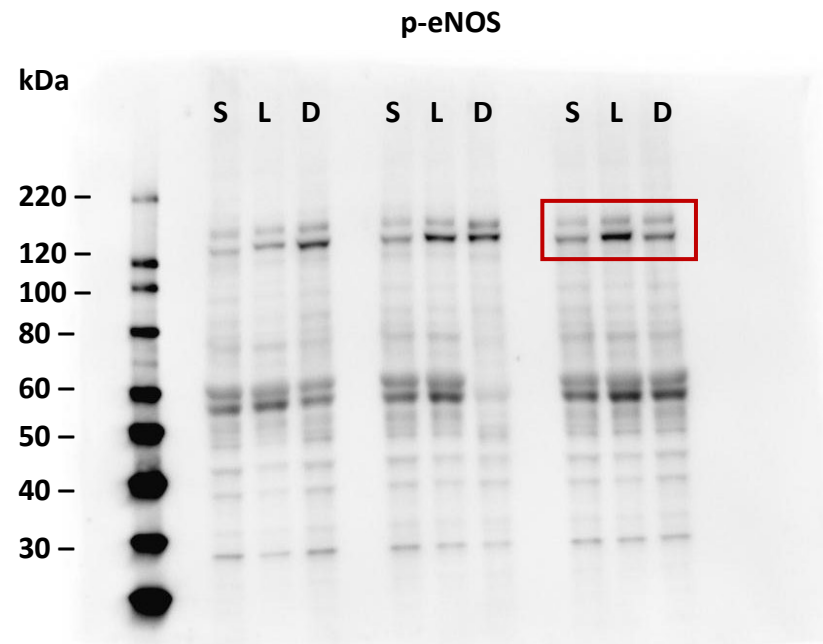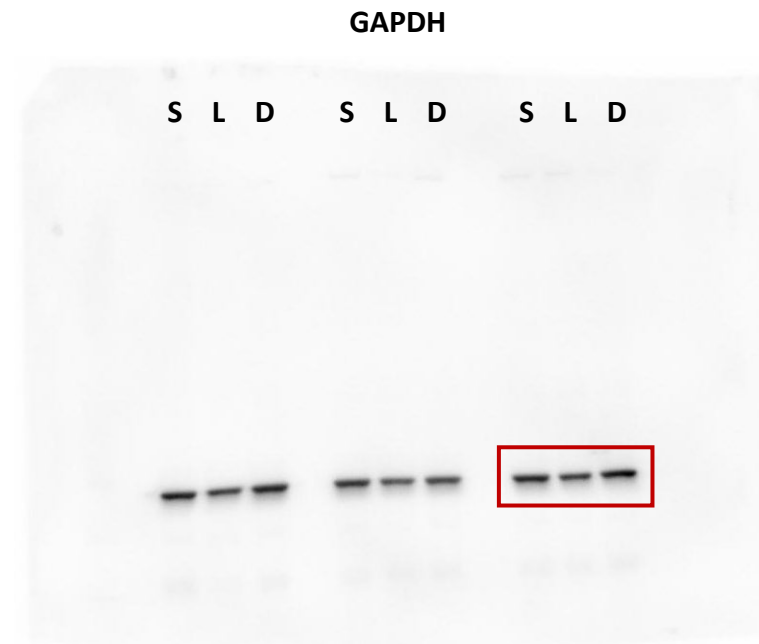

# Full unedited gel for Figure 2A

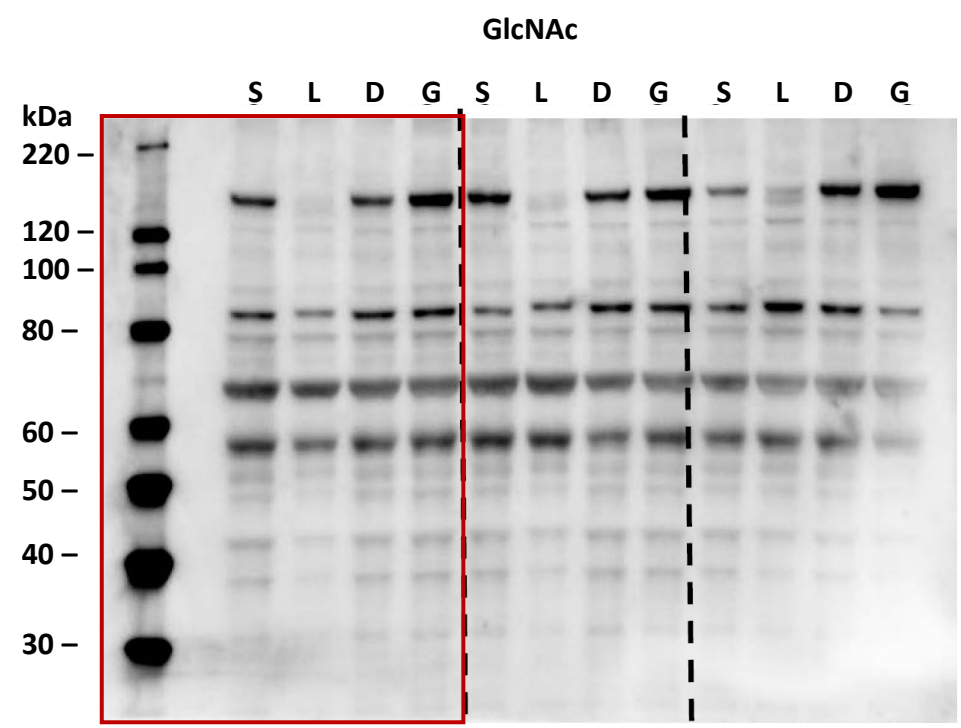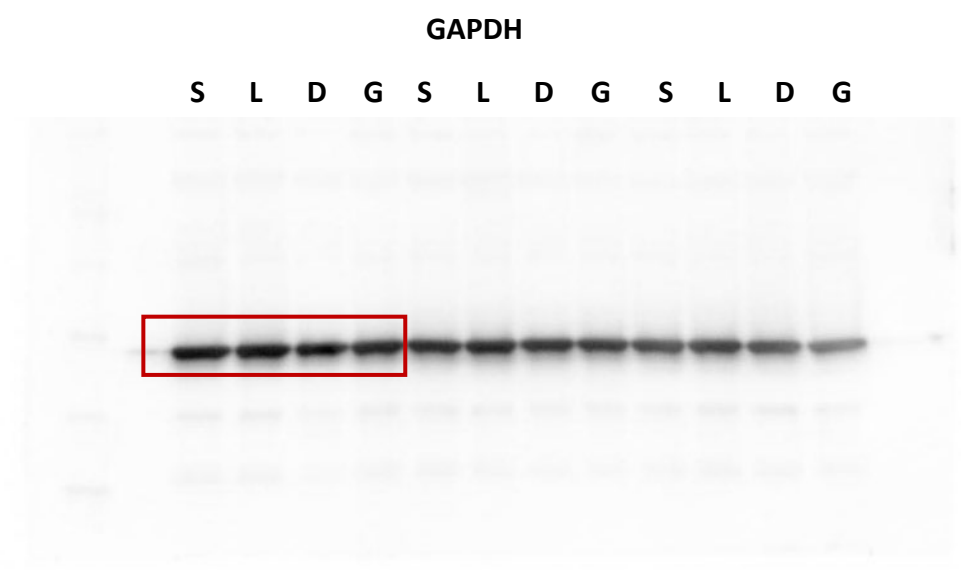

# Full unedited gel for Figure 2B

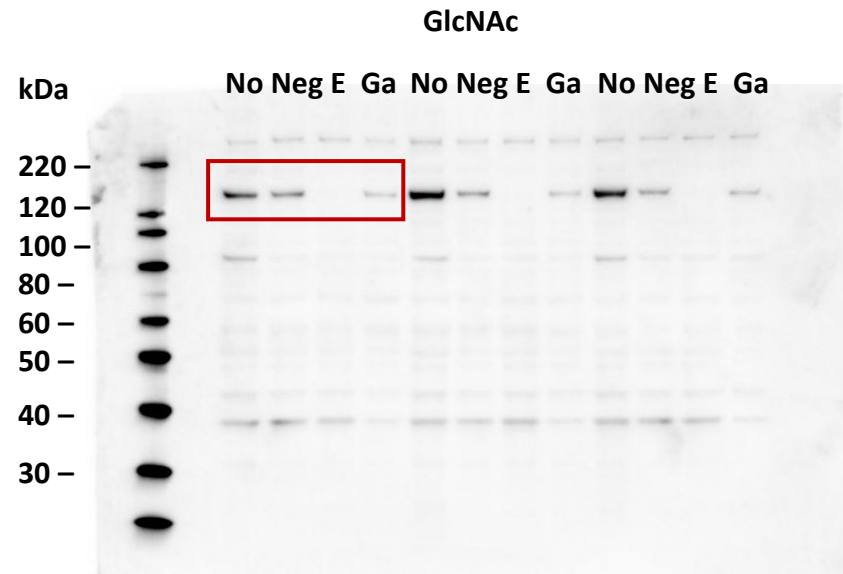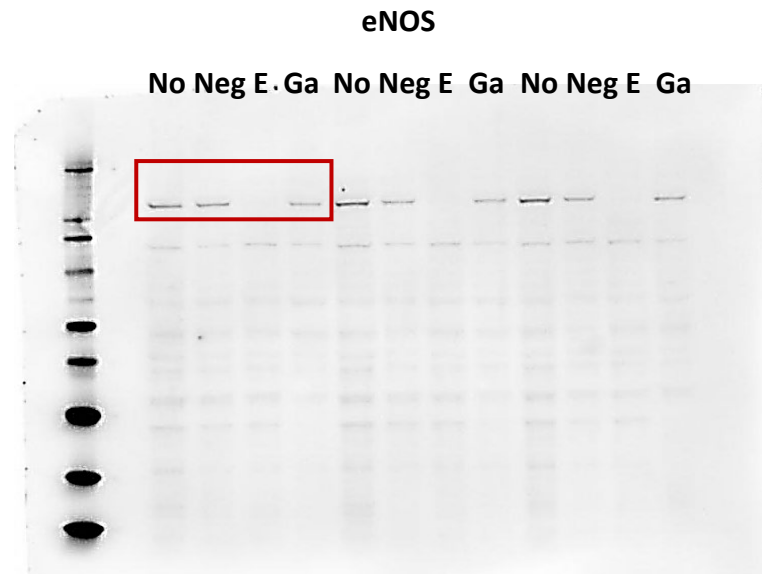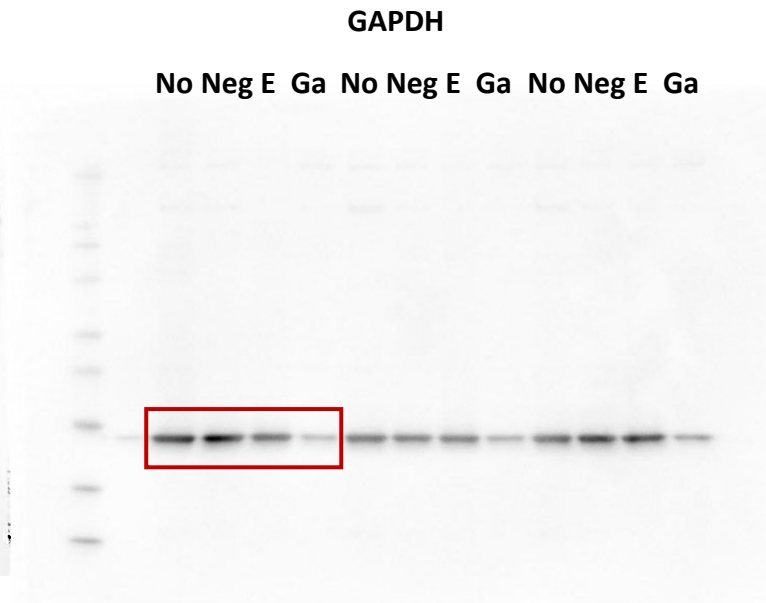

# Full unedited gel for Figure 2C

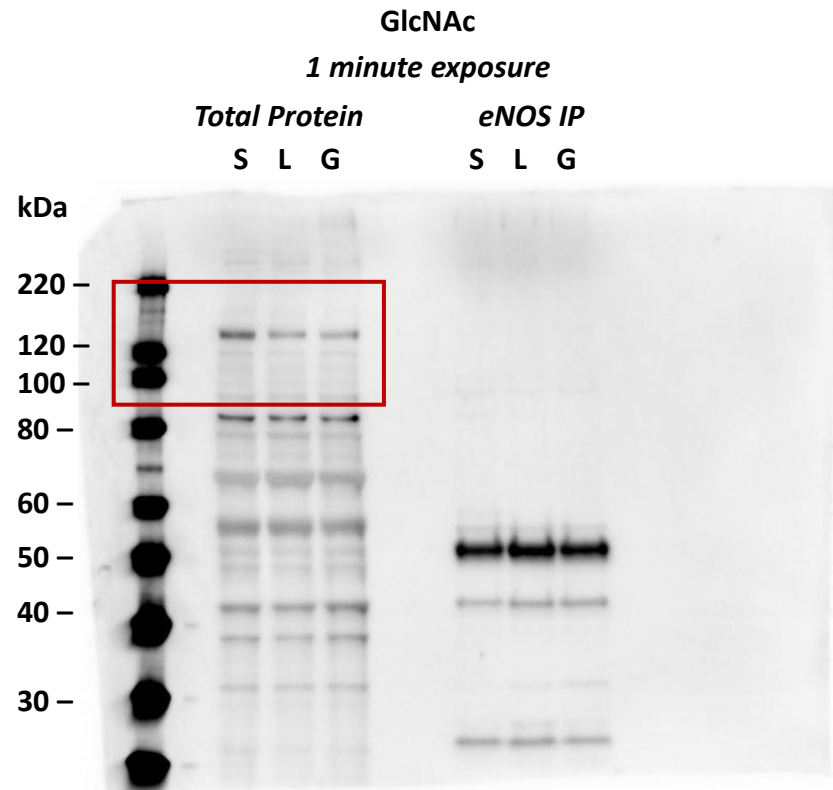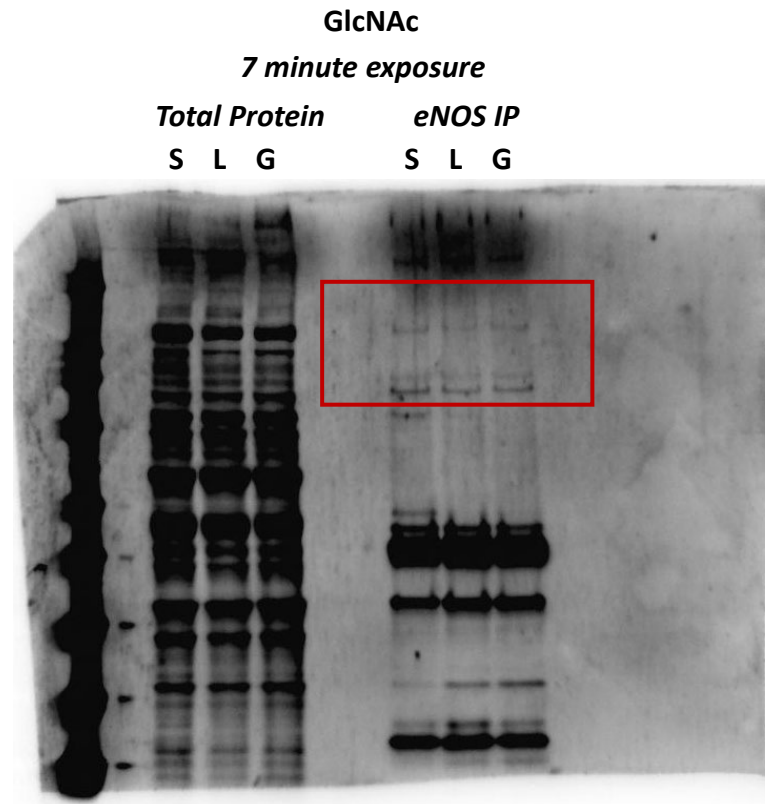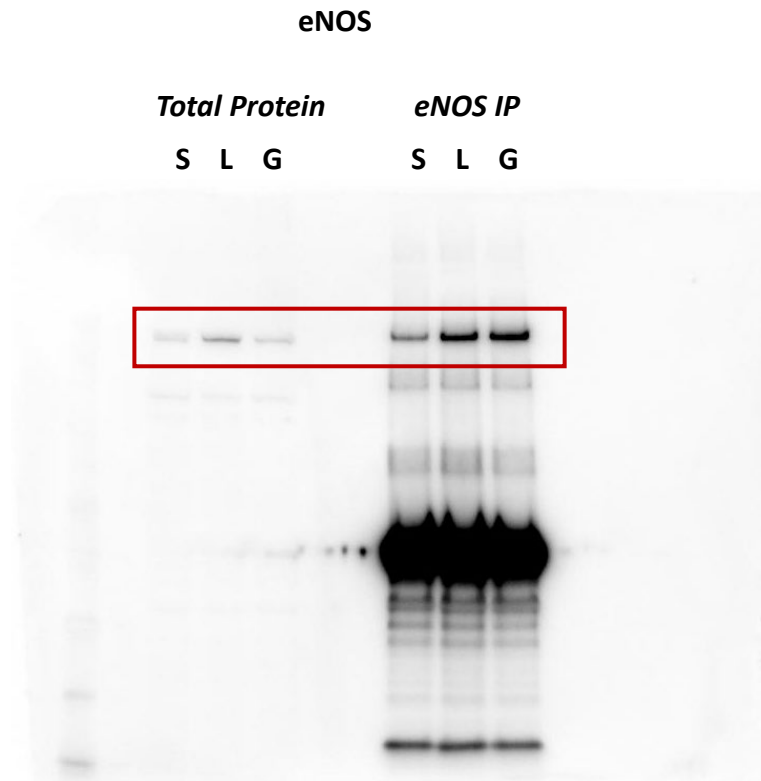

# Full unedited gel for Figure 3A

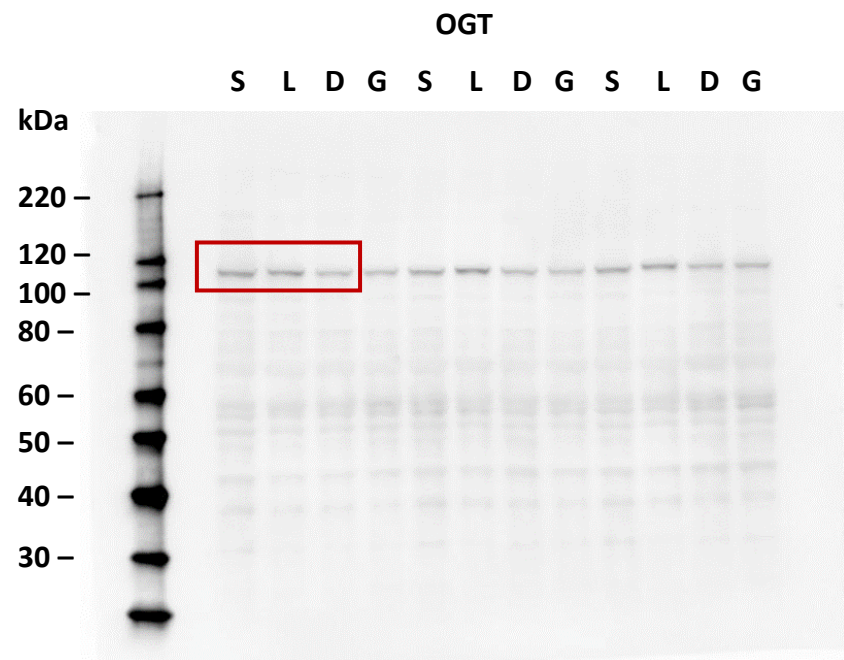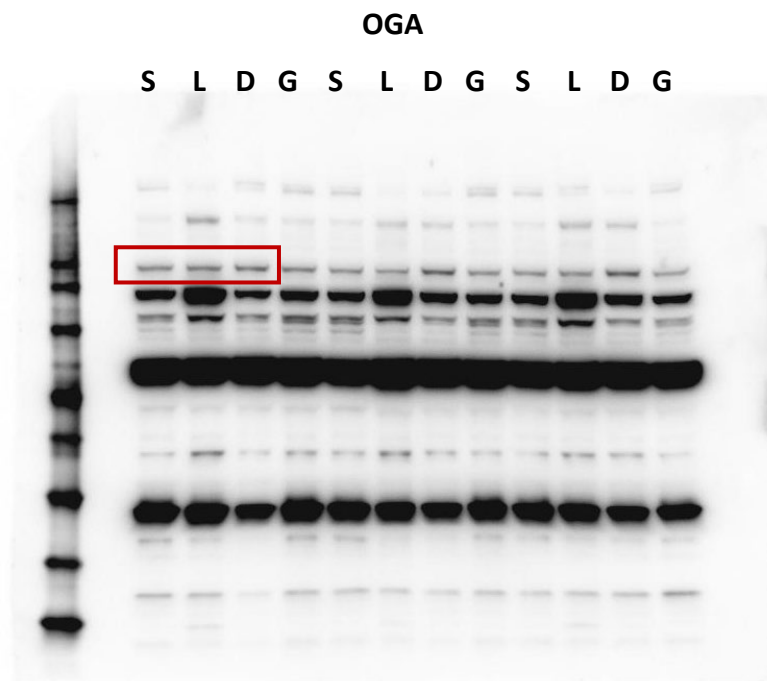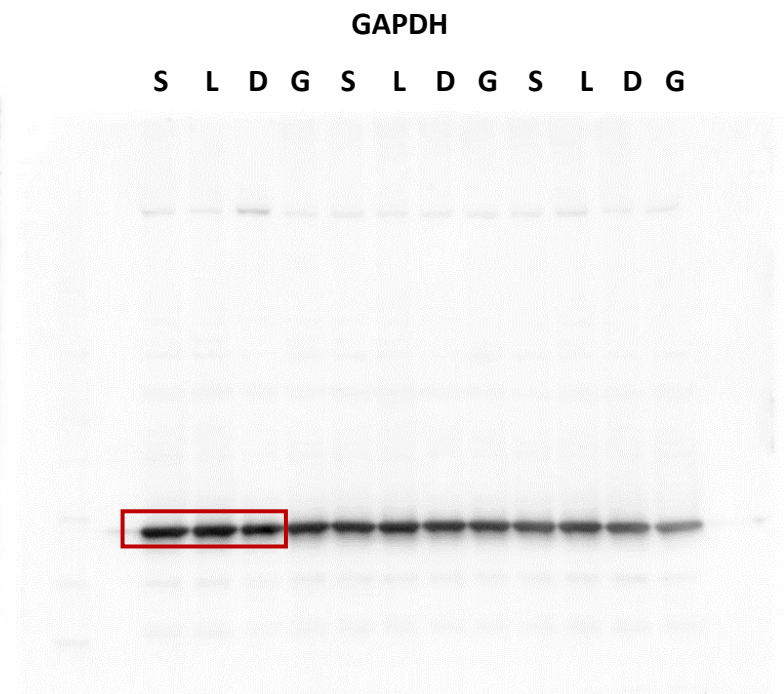

# Full unedited gel for Figure 3C

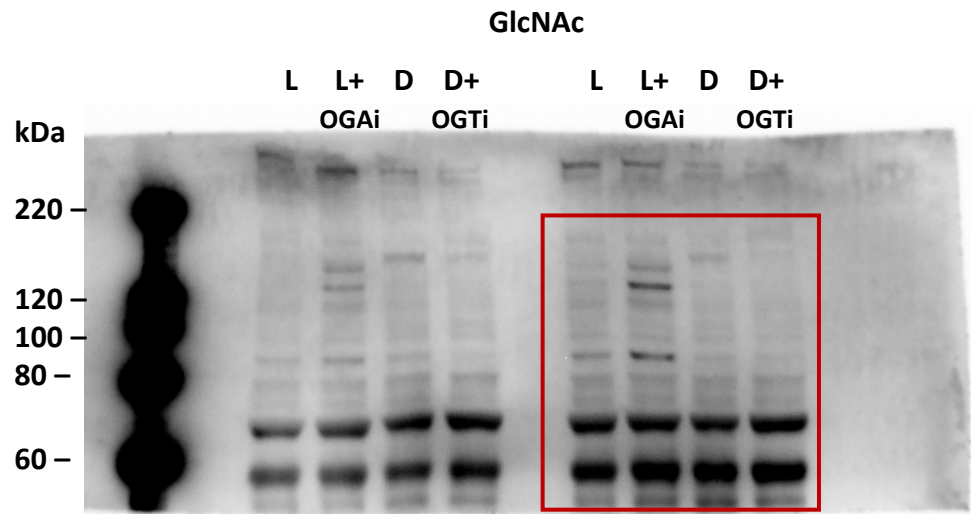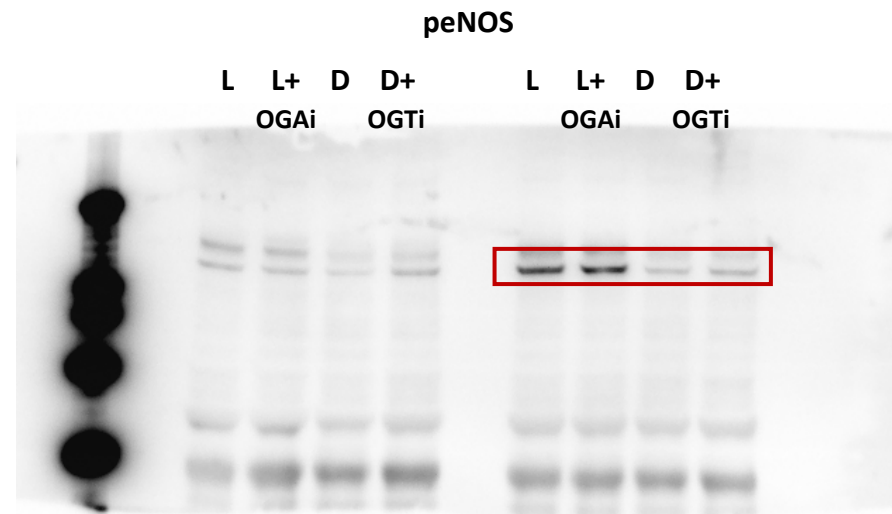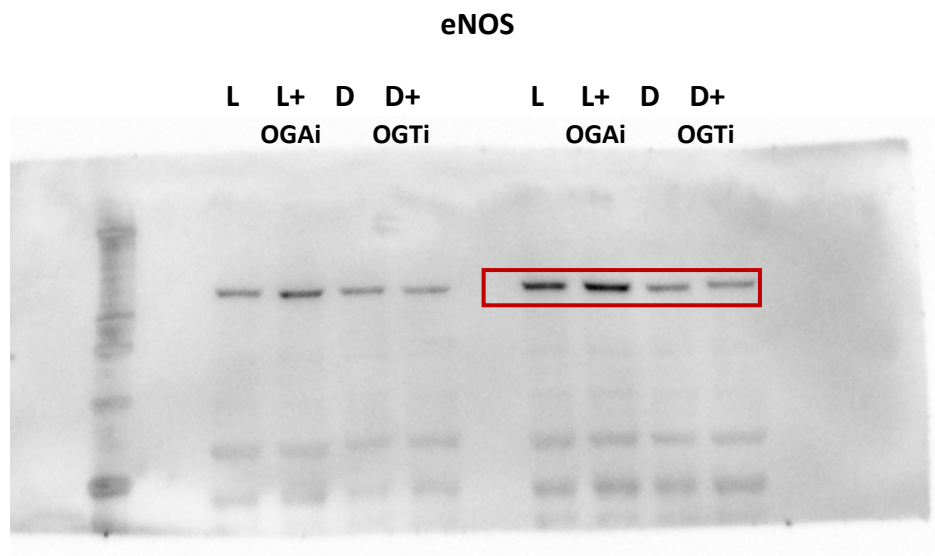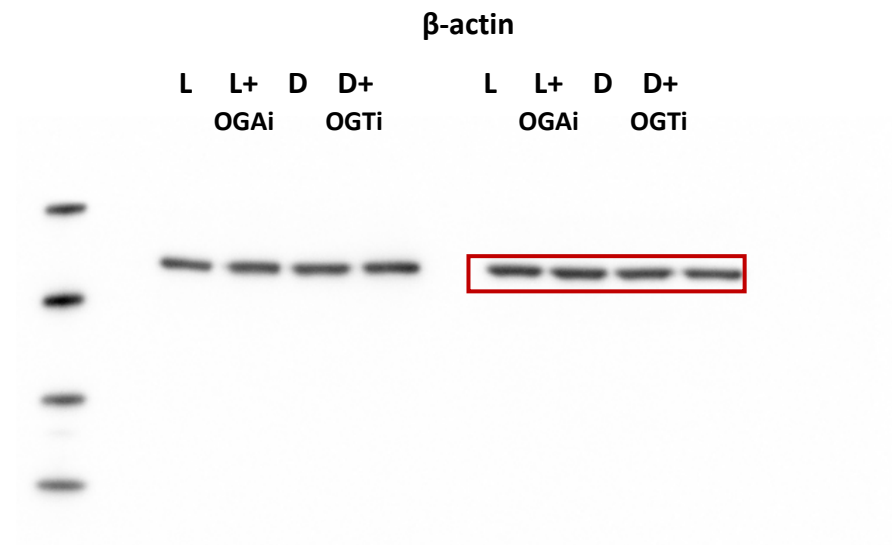

# Full unedited gel for Figure 4B

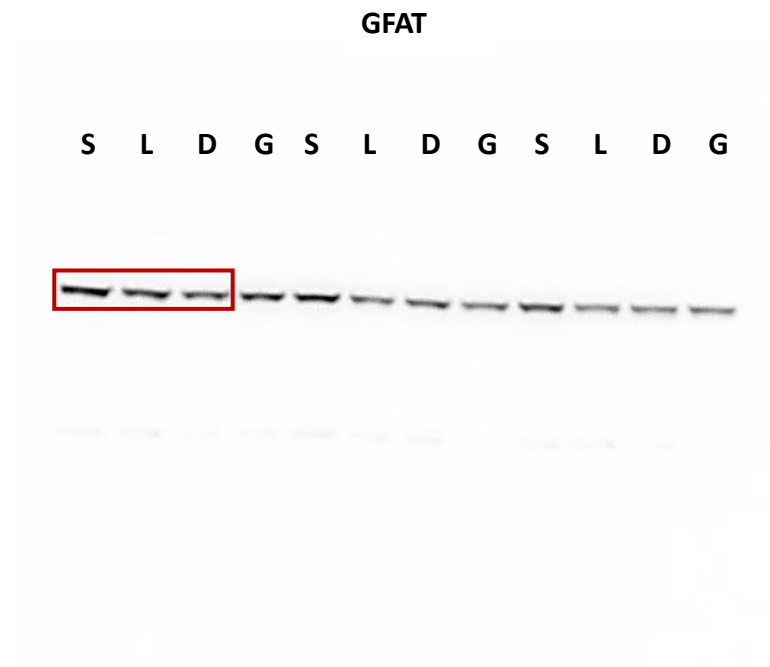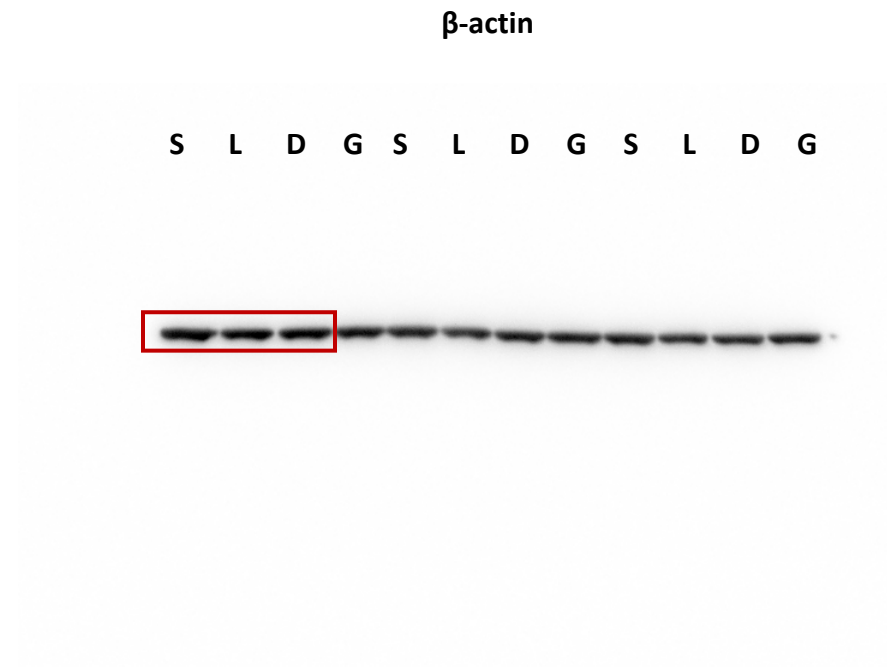



# Full unedited gel for Figure 4B

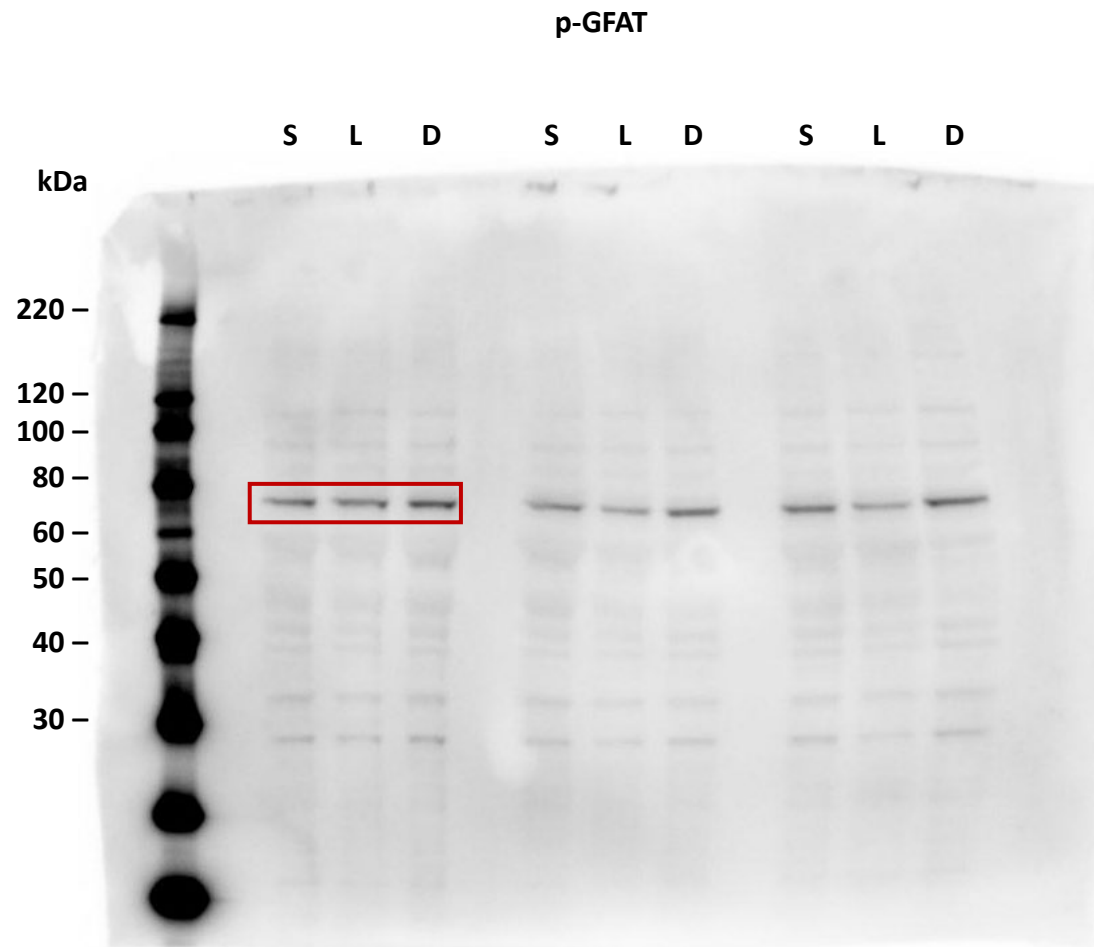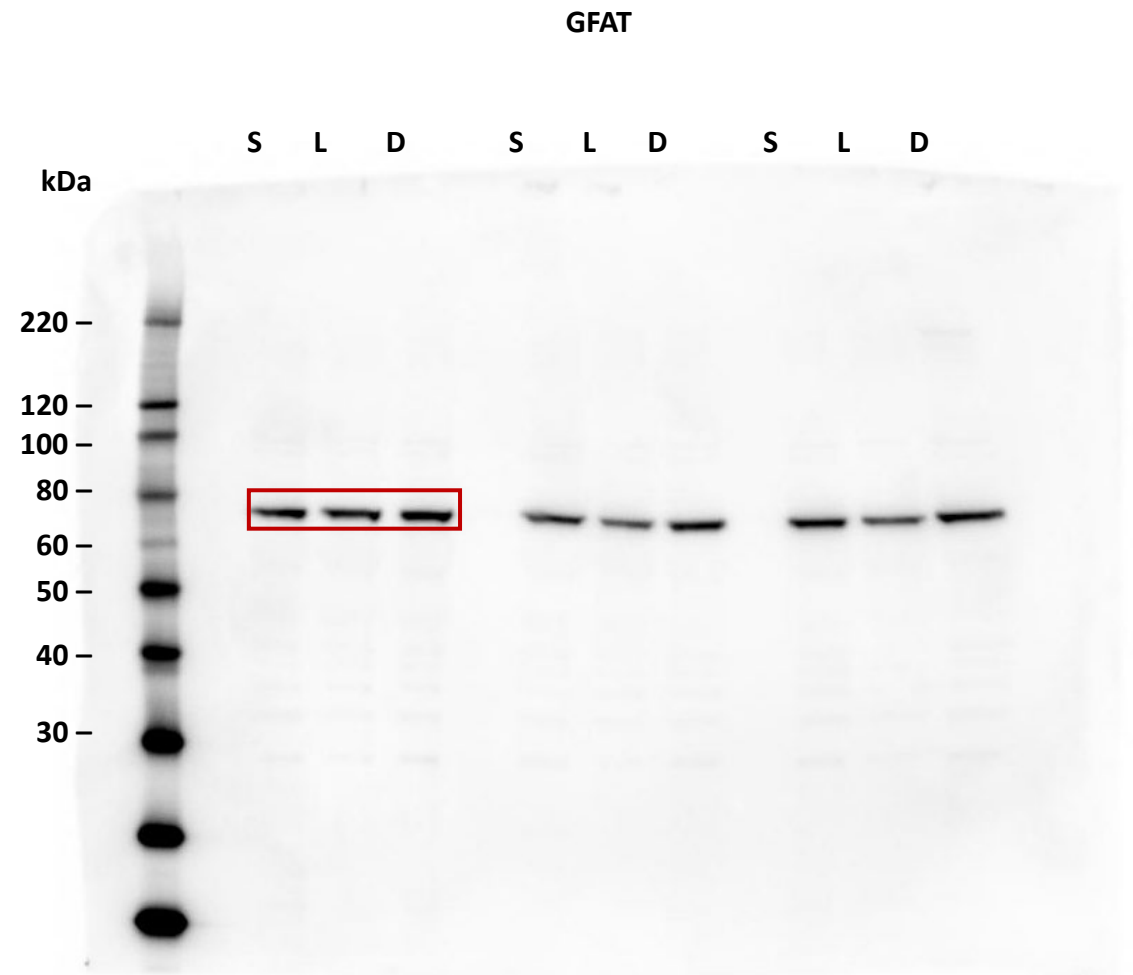

# Full unedited gel for Figure 4C

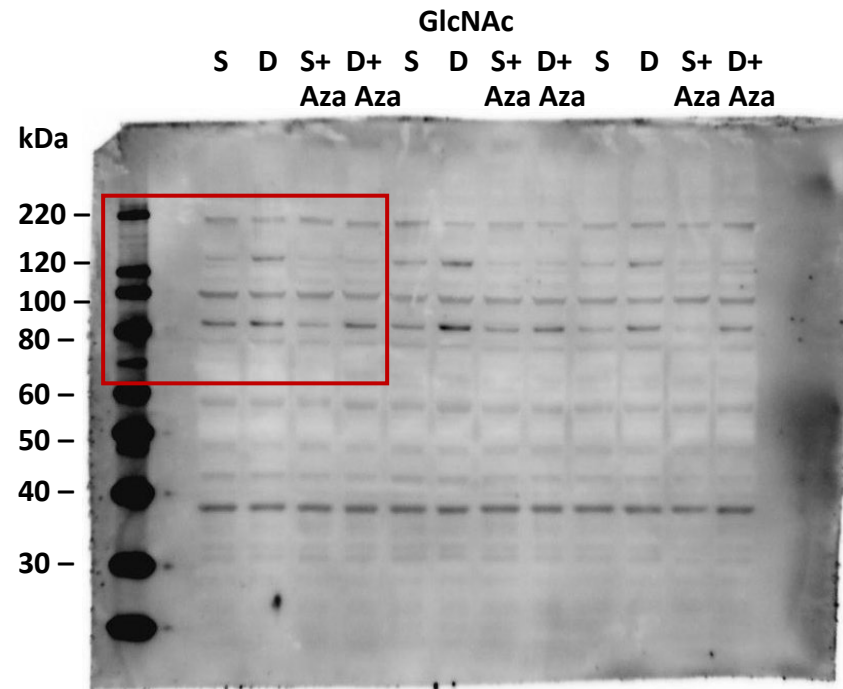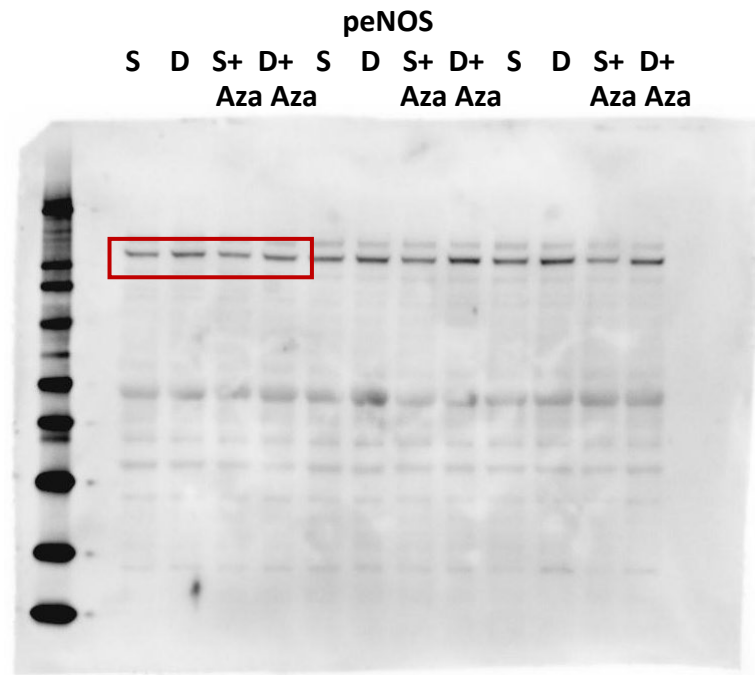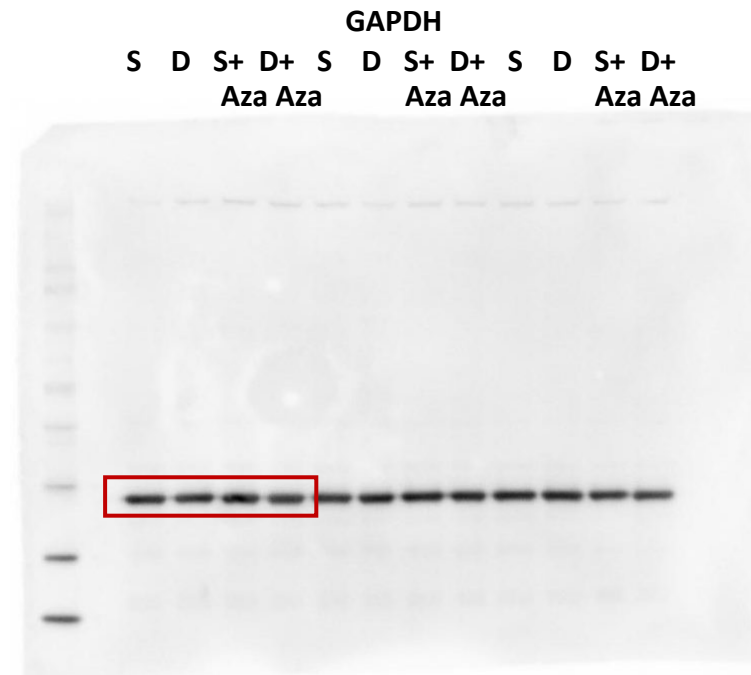

# Full unedited gel for Figure 5B

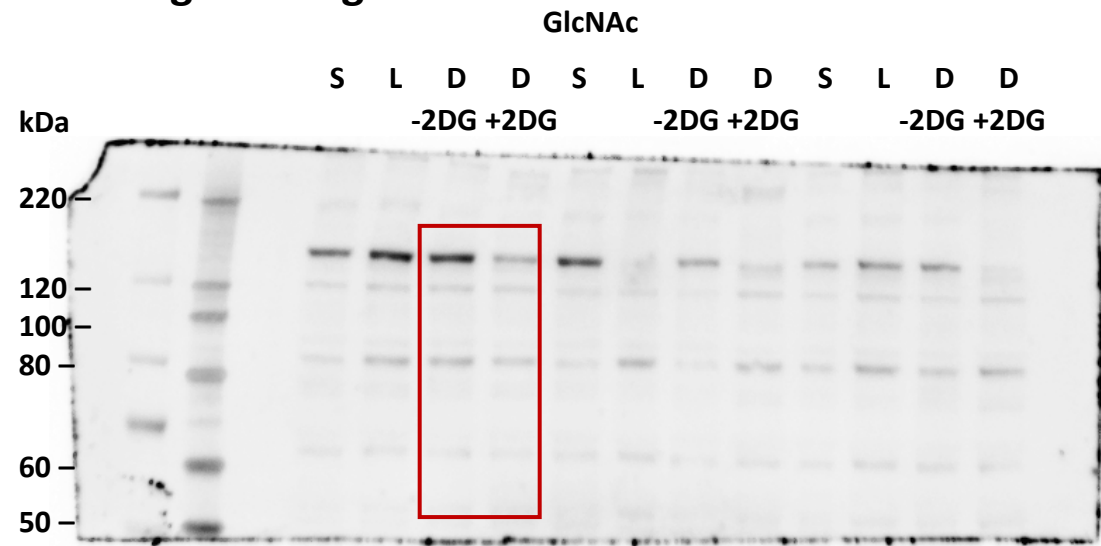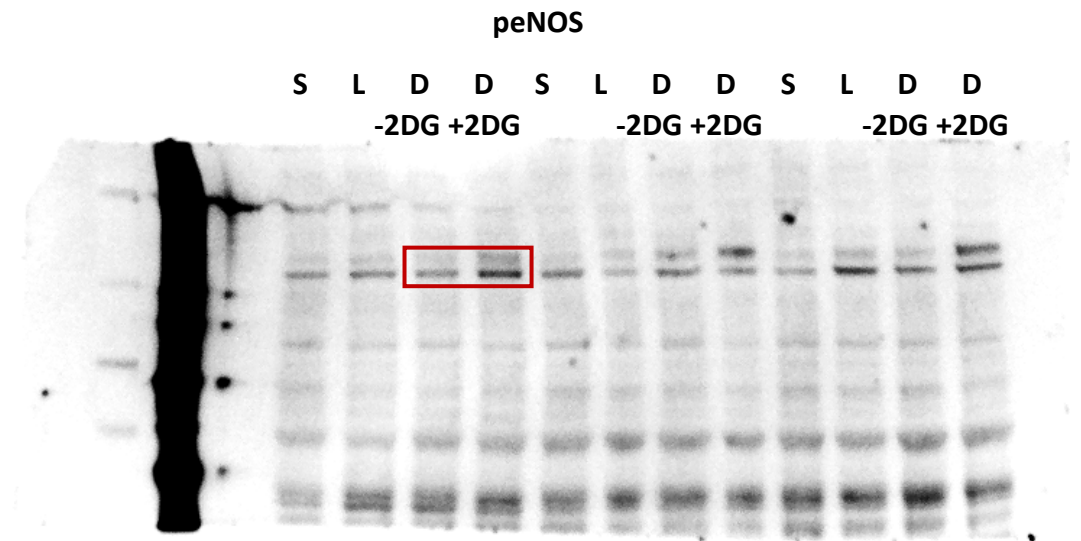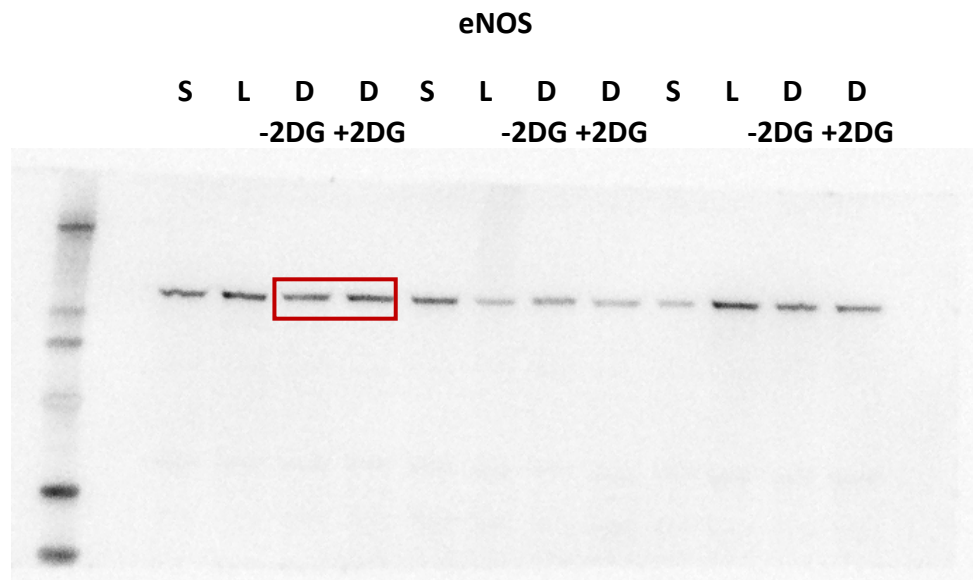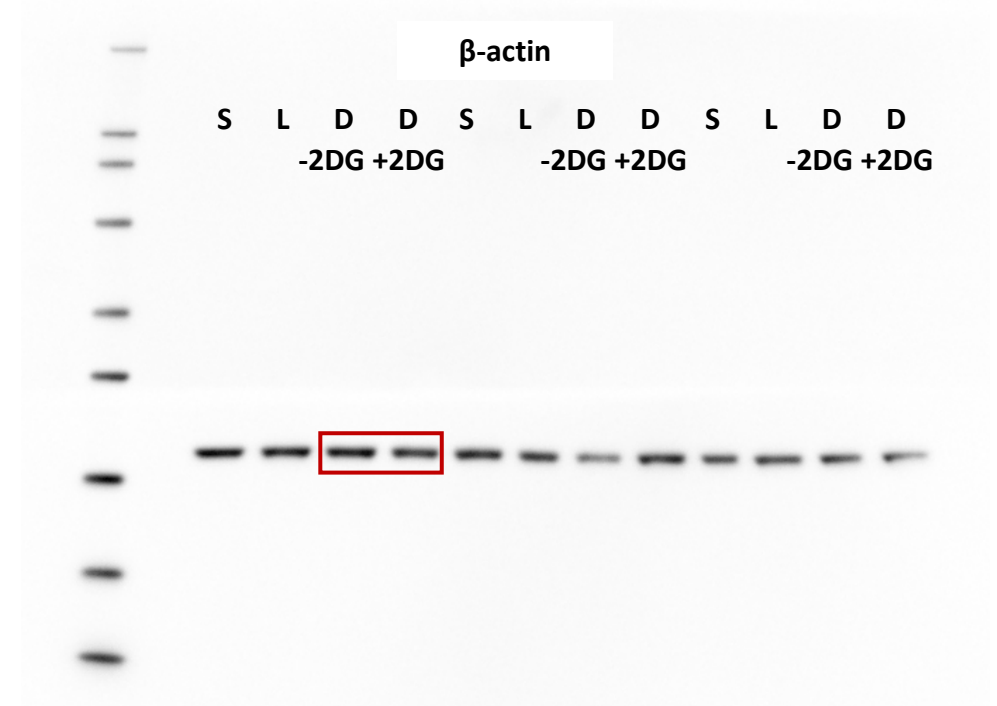

# Supplemental Figures

# Full unedited gel for Figure S1A

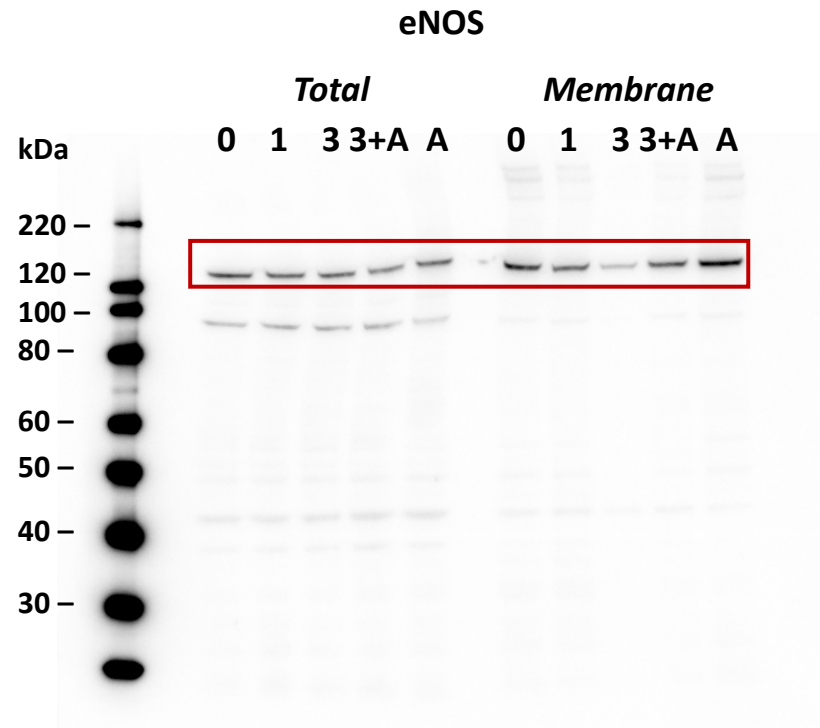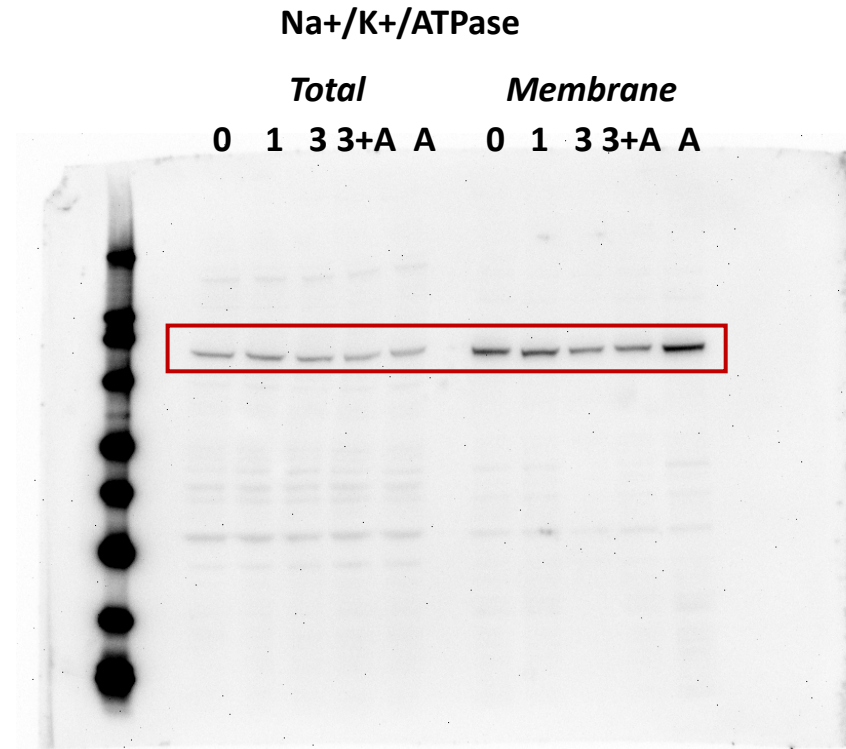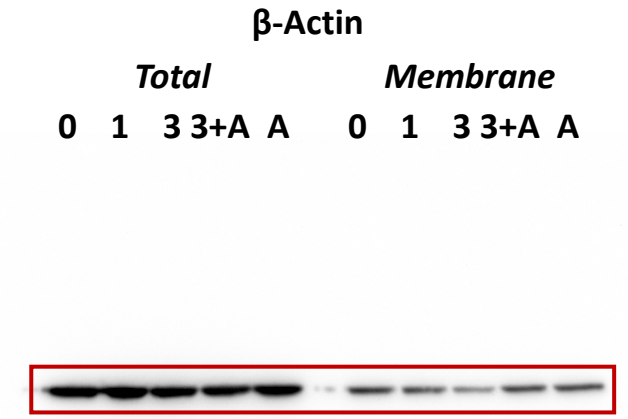

Full unedited gel for  
Figure S1B

eNOS GlcNAc

P-eNOS

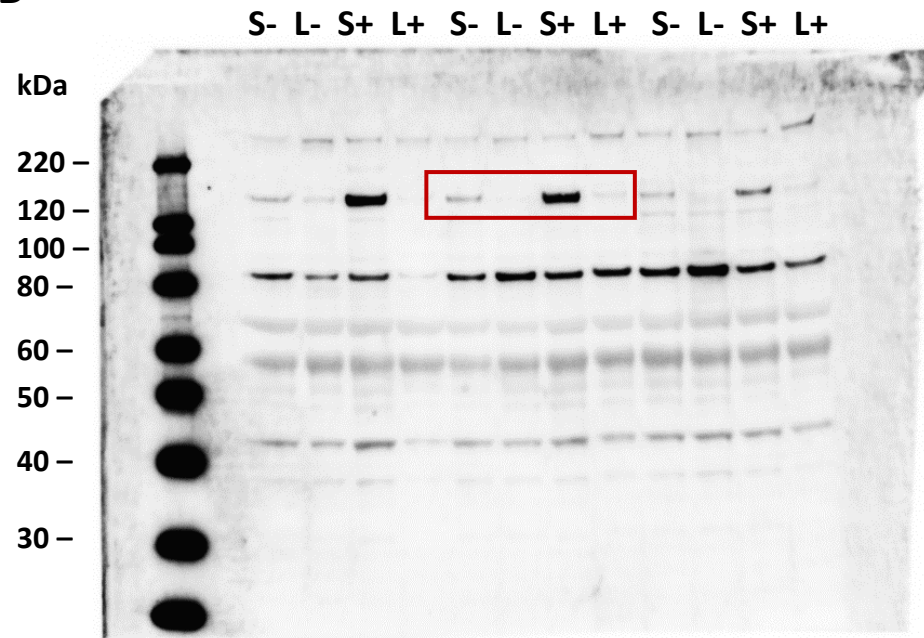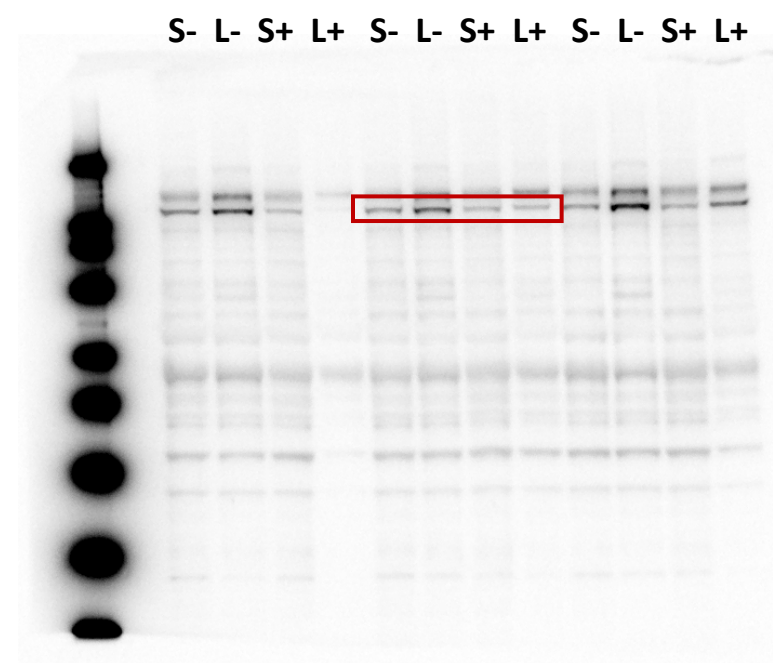

eNOS

$\beta$ -Actin

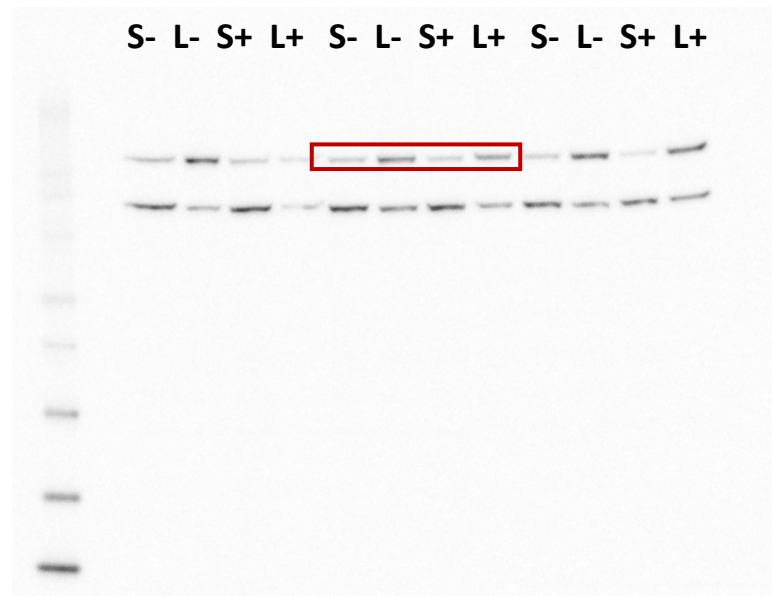

S- L- S+ L+ S- L- S+ L+ S- L- S+ L+

# Full unedited gel for Figure S1C

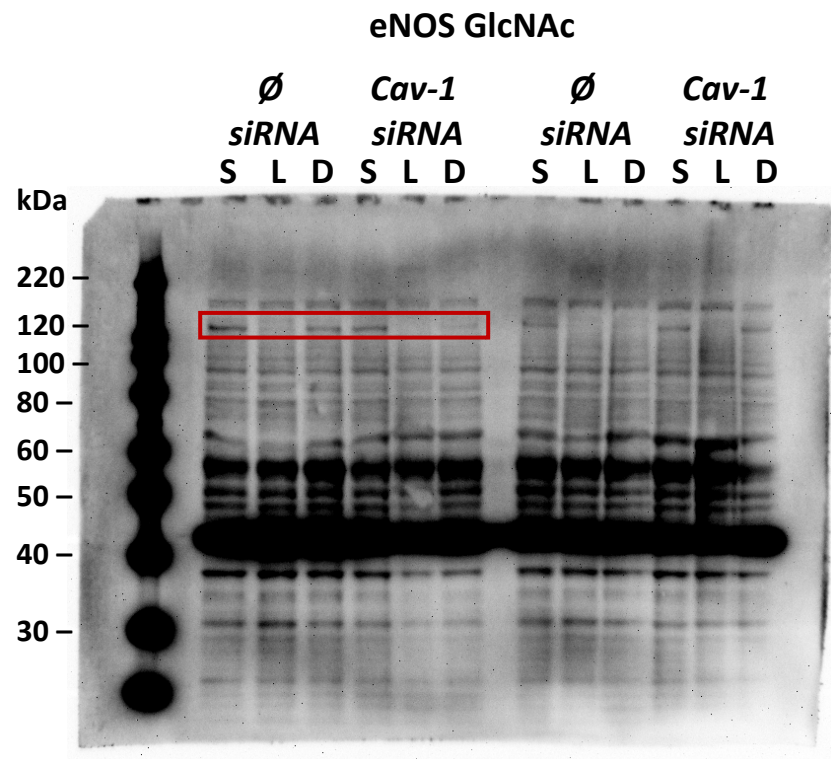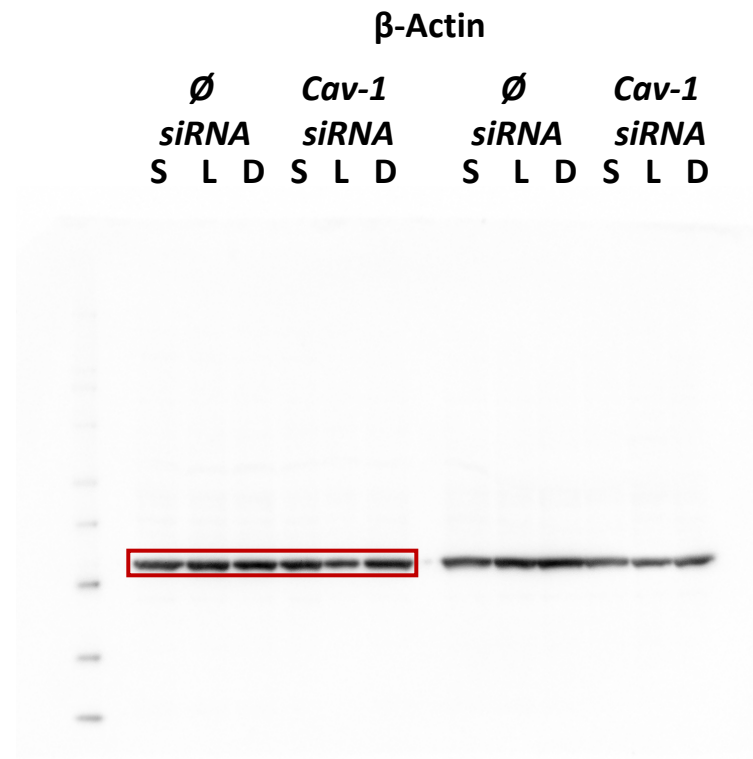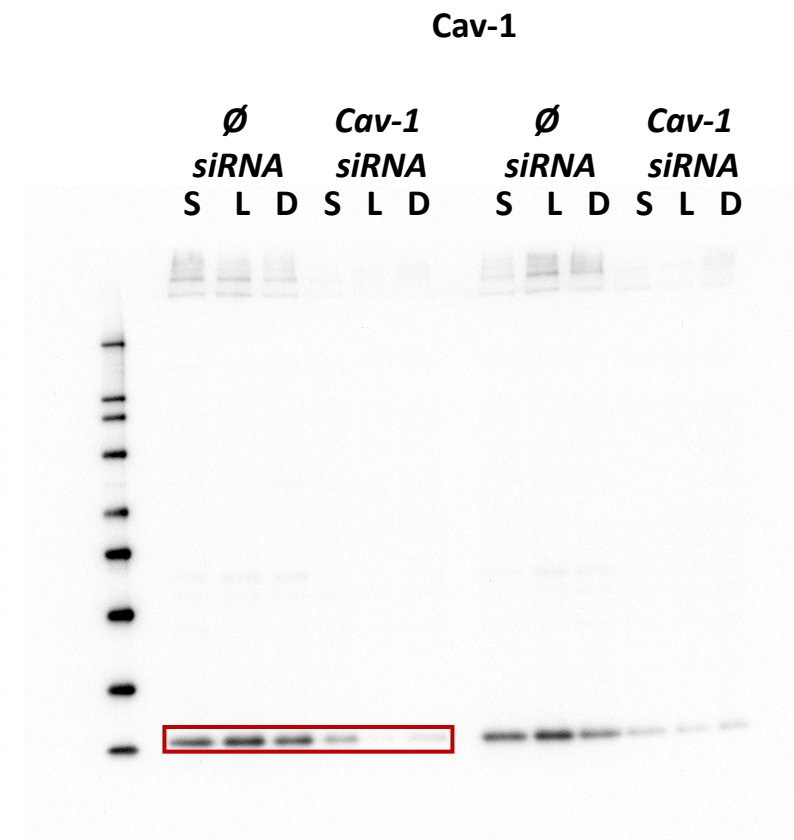

# Full unedited gel for Figure S2

GlcNAc

S L D S L D S L D

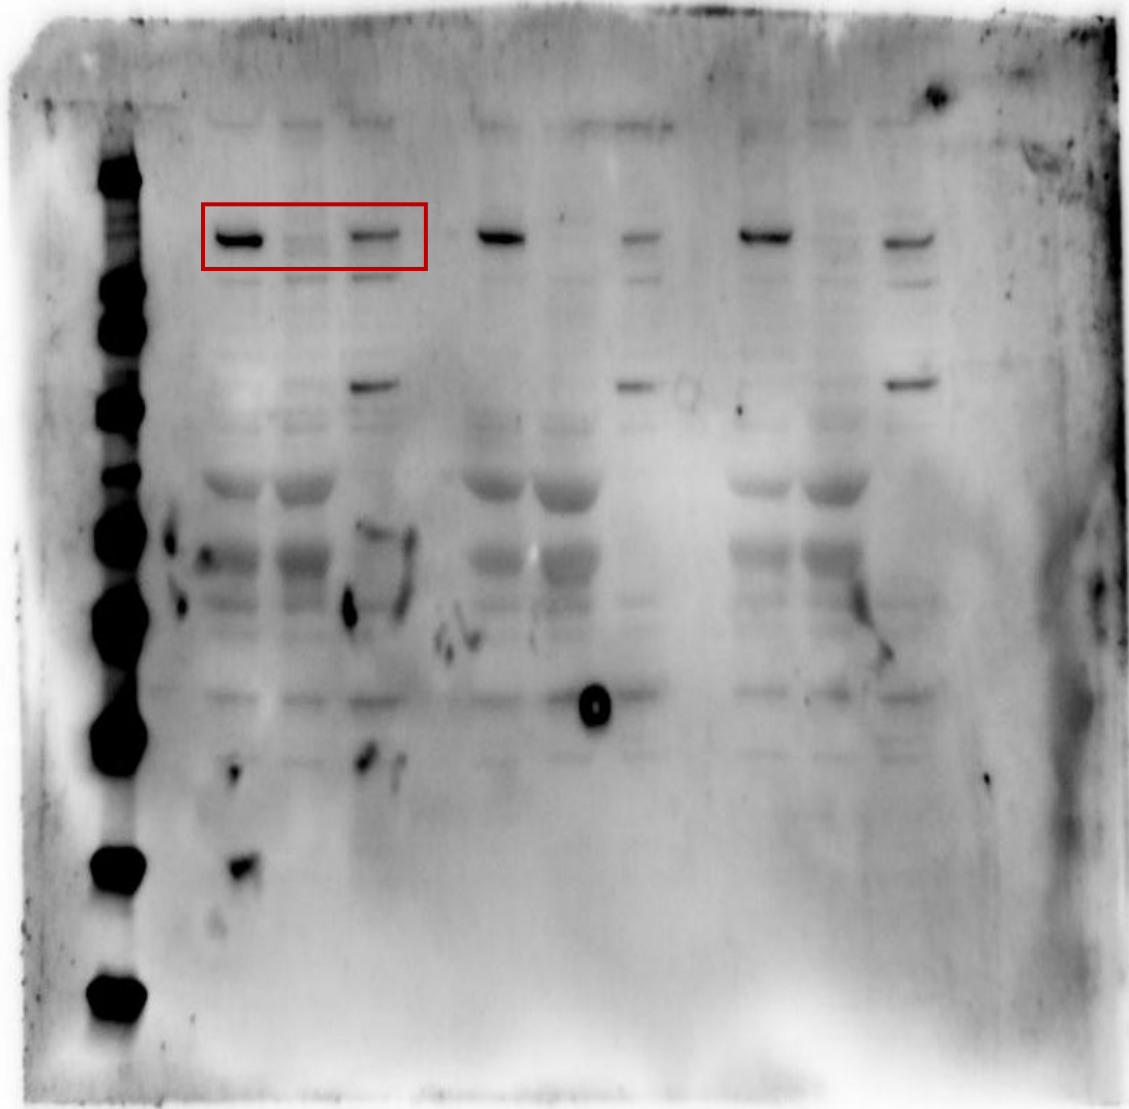

GAPDH

S L D S L D S L D

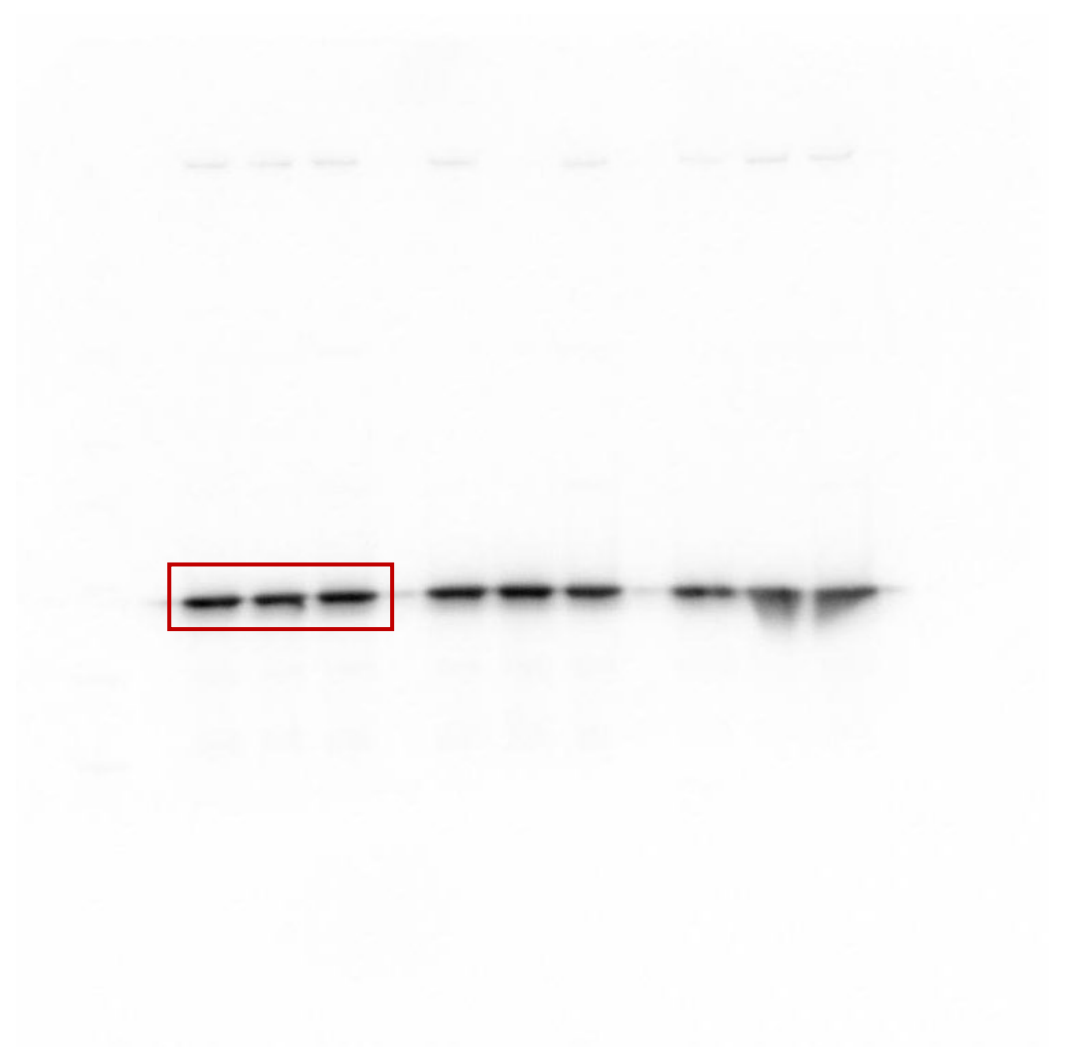



gel for Figure S3 1 hour GlcNAc

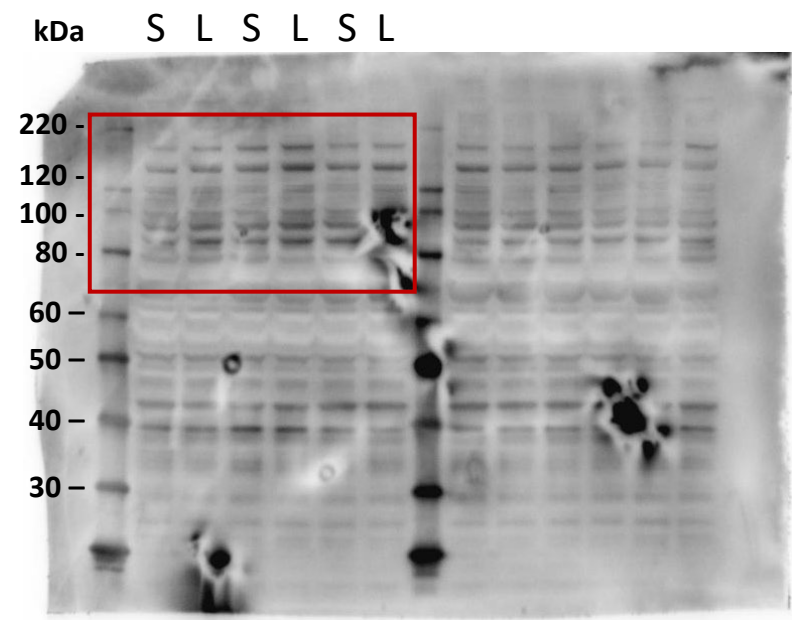

3 hour GlcNAc

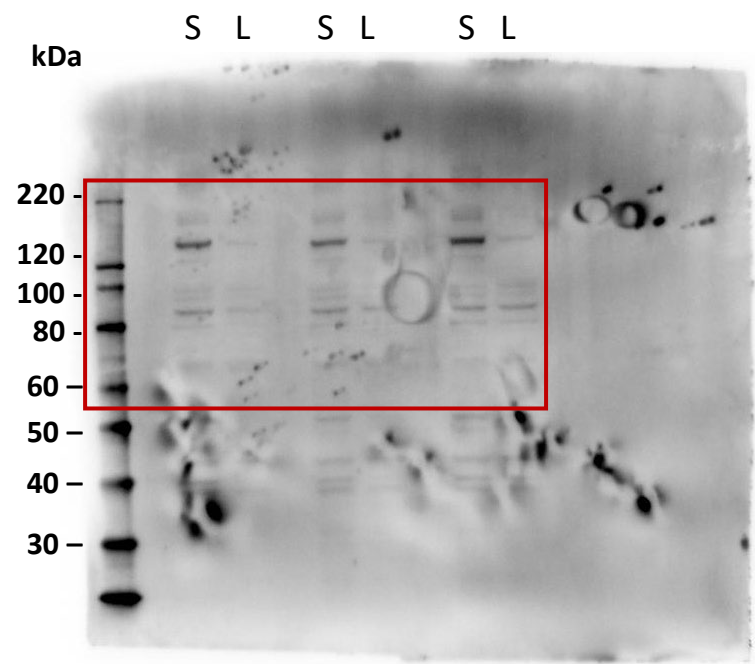

6 hour GlcNAc

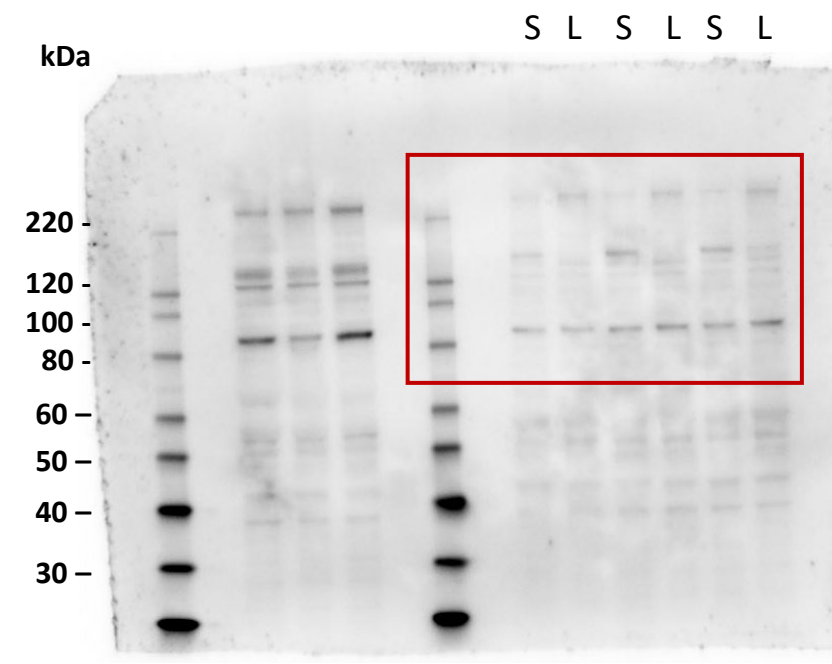

GAPDH

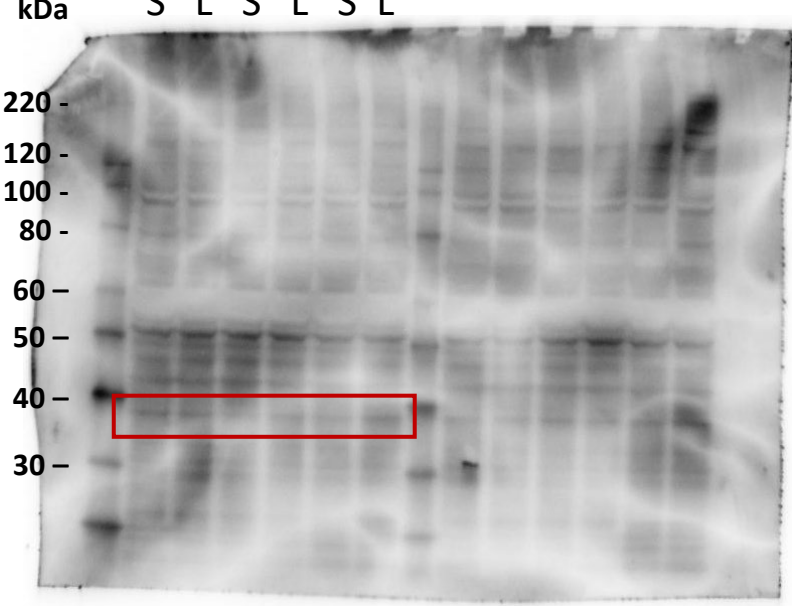

GAPDH

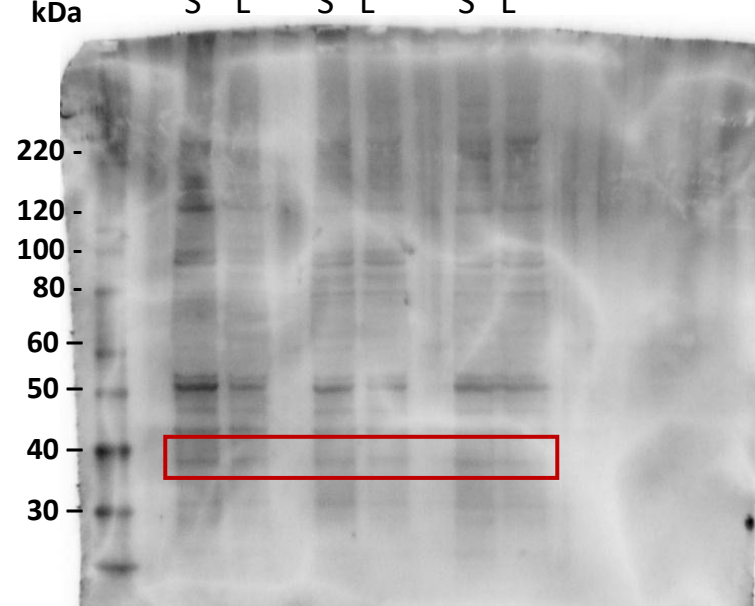

GAPDH

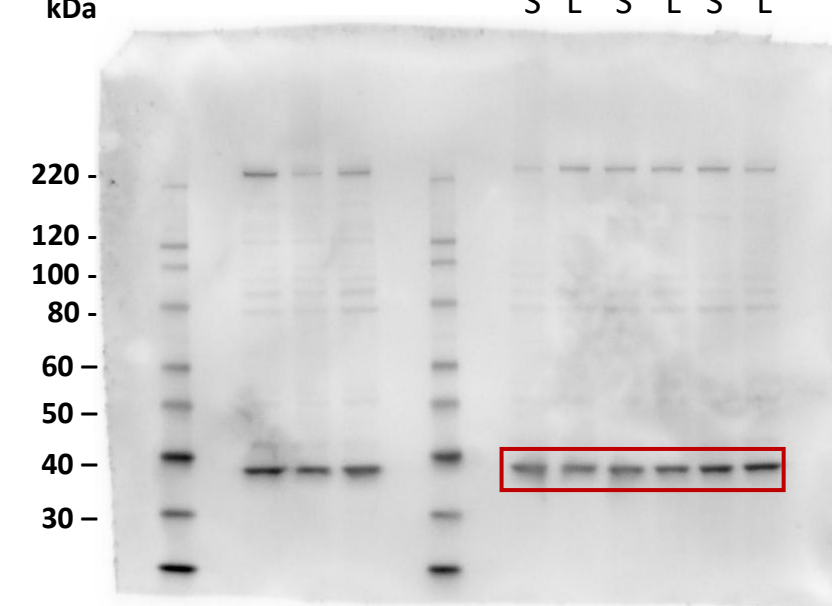

Supplement: NIHMS1745851-supplement-318982_Unc318982_Major_Resources_Table_ut_Gel_Blots.pdf [file NIHMS1745851-supplement-318982_Unc318982_Major_Resources_Table_ut_Gel_Blots.pdf]
