# Supplementary material
Source: PubMed Central journal article supplement (PMC8653916)
Supplement: NIHMS1745851-supplement-318982_Major_Resources_Table.pdf [file NIHMS1745851-supplement-318982_Major_Resources_Table.pdf]

## Major Resources Table

In order to allow validation and replication of experiments, all essential research materials listed in the Methods should be included in the Major Resources Table below. Authors are encouraged to use public repositories for protocols, data, code, and other materials and provide persistent identifiers and/or links to repositories when available. Authors may add or delete rows as needed.

### Animals (in vivo studies)

| Species | Vendor or Source     | Background Strain | Sex  | Persistent ID / URL                                                               |
|---------|----------------------|-------------------|------|-----------------------------------------------------------------------------------|
| Mice    | Jackson Laboratories | C57BL/6           | Male | <a href="https://www.jax.org/strain/000664">https://www.jax.org/strain/000664</a> |
|         |                      |                   |      |                                                                                   |
|         |                      |                   |      |                                                                                   |

### Genetically Modified Animals

|                 | Species | Vendor or Source | Background Strain | Other Information | Persistent ID / URL |
|-----------------|---------|------------------|-------------------|-------------------|---------------------|
| Parent - Male   |         |                  |                   |                   |                     |
| Parent - Female |         |                  |                   |                   |                     |

### Antibodies

| Target antigen | Vendor or Source | Catalog #  | Working concentration | Lot # (preferred but not required) | Persistent ID / URL                                                                                                                                                                                                                                                                                                                                                                                               |
|----------------|------------------|------------|-----------------------|------------------------------------|-------------------------------------------------------------------------------------------------------------------------------------------------------------------------------------------------------------------------------------------------------------------------------------------------------------------------------------------------------------------------------------------------------------------|
| eNOS           | Cell Signaling   | 9586S      | 1:100                 |                                    | <a href="https://www.cellsignal.com/products/primary-antibodies/enos-49g3-rabbit-mab/9586">https://www.cellsignal.com/products/primary-antibodies/enos-49g3-rabbit-mab/9586</a>                                                                                                                                                                                                                                   |
| O-GlcNAc       | Cell Signaling   | 9875S      | 1:1000                |                                    | <a href="https://www.cellsignal.com/products/primary-antibodies/o-glcna-ctd110-6-mouse-mab/9875?site-search-type=Products&amp;N=4294956287&amp;Ntt=9875s&amp;fromPage=plp&amp;_requestid=2126291">https://www.cellsignal.com/products/primary-antibodies/o-glcna-ctd110-6-mouse-mab/9875?site-search-type=Products&amp;N=4294956287&amp;Ntt=9875s&amp;fromPage=plp&amp;_requestid=2126291</a>                     |
| OGT            | Cell Signaling   | 24083      | 1:1000                |                                    | <a href="https://www.cellsignal.com/products/primary-antibodies/ogt-d1d8q-rabbit-mab/24083">https://www.cellsignal.com/products/primary-antibodies/ogt-d1d8q-rabbit-mab/24083</a>                                                                                                                                                                                                                                 |
| p-eNOS         | Cell Signaling   | 9570S      | 1:1000                |                                    | <a href="https://www.cellsignal.com/products/primary-antibodies/phospho-enos-ser1177-c9c3-rabbit-mab/9570?site-search-type=Products&amp;N=4294956287&amp;Ntt=9570s&amp;fromPage=plp&amp;_requestid=2126531">https://www.cellsignal.com/products/primary-antibodies/phospho-enos-ser1177-c9c3-rabbit-mab/9570?site-search-type=Products&amp;N=4294956287&amp;Ntt=9570s&amp;fromPage=plp&amp;_requestid=2126531</a> |
| eNOS           | Cell Signaling   | 9572S      | 1:1000                |                                    | <a href="https://www.cellsignal.com/products/primary-antibodies/enos-antibody/9572?site-search-type=Products&amp;N=4294956287&amp;Ntt=9572s&amp;fromPage=plp&amp;_requestid=2126591">https://www.cellsignal.com/products/primary-antibodies/enos-antibody/9572?site-search-type=Products&amp;N=4294956287&amp;Ntt=9572s&amp;fromPage=plp&amp;_requestid=2126591</a>                                               |
| PFKFB3         | Cell Signaling   | 13123S     | 1:1000                |                                    | <a href="https://www.cellsignal.com/products/primary-antibodies/pfkfb3-d7h4q-rabbit-mab/13123?site-search-type=Products&amp;N=4294956287&amp;Ntt=13123s&amp;fromPage=plp&amp;_requestid=2126654">https://www.cellsignal.com/products/primary-antibodies/pfkfb3-d7h4q-rabbit-mab/13123?site-search-type=Products&amp;N=4294956287&amp;Ntt=13123s&amp;fromPage=plp&amp;_requestid=2126654</a>                       |
| GFAT1          | Cell Signaling   | 5322       | 1:1000                |                                    | <a href="https://www.cellsignal.com/products/primary-antibodies/gfat1-d12f4-rabbit-mab/5322">https://www.cellsignal.com/products/primary-antibodies/gfat1-d12f4-rabbit-mab/5322</a>                                                                                                                                                                                                                               |
| OGA            | Sigma            | SAB4200267 | 1:1000                |                                    | <a href="https://www.sigmaaldrich.com/US/en/product/sigma/sab4200267">https://www.sigmaaldrich.com/US/en/product/sigma/sab4200267</a>                                                                                                                                                                                                                                                                             |
| p-GFAT1        | IBL-             | 28123      | 1:1000                |                                    | <a href="https://www.ibl-america.com/gfat1-s243-phosphorylated-">https://www.ibl-america.com/gfat1-s243-phosphorylated-</a>                                                                                                                                                                                                                                                                                       |

DOI [to be added]

|                           |              |            |        |  |                                                                                                                                                                                                                                                                                               |
|---------------------------|--------------|------------|--------|--|-----------------------------------------------------------------------------------------------------------------------------------------------------------------------------------------------------------------------------------------------------------------------------------------------|
|                           | America      |            |        |  | anti-human-rabbit-igg-affinity-purify/                                                                                                                                                                                                                                                        |
| Na+/K+/ATPase             | Santa Cruz   | SC-28800   | 1:1000 |  | <a href="https://www.scbt.com/p/na-plus-k-plus-atpase-alpha-antibody-h-300">https://www.scbt.com/p/na-plus-k-plus-atpase-alpha-antibody-h-300</a>                                                                                                                                             |
| Caveolin-1                | Santa Cruz   | SC-70516   | 1:1000 |  | <a href="https://www.scbt.com/p/caveolin-1-antibody-4h312?requestFrom=search">https://www.scbt.com/p/caveolin-1-antibody-4h312?requestFrom=search</a>                                                                                                                                         |
| Anti-Rabbit IgG           | Promega      | W4011      | 1:2000 |  | <a href="https://www.promega.com/products/protein-detection/primary-and-secondary-antibodies/anti-rabbit-igg-h-and-l-hrp-conjugate/?catNum=W4011">https://www.promega.com/products/protein-detection/primary-and-secondary-antibodies/anti-rabbit-igg-h-and-l-hrp-conjugate/?catNum=W4011</a> |
| Anti-Mouse IgG            | Promega      | W4021      | 1:2000 |  | <a href="https://www.promega.com/products/protein-detection/primary-and-secondary-antibodies/anti_mouse-igg-h-and-l-hrp-conjugate/?catNum=W4021">https://www.promega.com/products/protein-detection/primary-and-secondary-antibodies/anti_mouse-igg-h-and-l-hrp-conjugate/?catNum=W4021</a>   |
| GAPDH                     | ThermoFisher | 437000     | 1:1000 |  | <a href="https://www.thermofisher.com/antibody/product/GAPDH-Antibody-clone-258-Monoclonal/437000">https://www.thermofisher.com/antibody/product/GAPDH-Antibody-clone-258-Monoclonal/437000</a>                                                                                               |
| $\beta$ -actin            | Santa Cruz   | SC47778-C4 | 1:1000 |  | <a href="https://www.scbt.com/p/beta-actin-antibody-c4">https://www.scbt.com/p/beta-actin-antibody-c4</a>                                                                                                                                                                                     |
| O-GlcNAc                  | Biolegend    | 838004     | 1:100  |  | <a href="https://www.biolegend.com/de-de/products/purified-anti-o-glcnac-antibody-13607?GroupID=GROUP32">https://www.biolegend.com/de-de/products/purified-anti-o-glcnac-antibody-13607?GroupID=GROUP32</a>                                                                                   |
| ICAM-1                    | ThermoFisher | MA119123   | 1:100  |  | <a href="https://www.thermofisher.com/antibody/product/ICAM-1-Antibody-clone-MEM-111-Monoclonal/MA1-19123">https://www.thermofisher.com/antibody/product/ICAM-1-Antibody-clone-MEM-111-Monoclonal/MA1-19123</a>                                                                               |
| Mouse IgG1 AlexaFluor 488 | ThermoFisher | A-21121    | 1:100  |  | <a href="https://www.thermofisher.com/antibody/product/Goat-anti-Mouse-IgG1-Cross-Adsorbed-Secondary-Antibody-Polyclonal/A-21121">https://www.thermofisher.com/antibody/product/Goat-anti-Mouse-IgG1-Cross-Adsorbed-Secondary-Antibody-Polyclonal/A-21121</a>                                 |
| Mouse IgG AlexaFluor 594  | ThermoFisher | A-11001    | 1:100  |  | <a href="https://www.thermofisher.com/antibody/product/Goat-anti-Mouse-IgG-H-L-Cross-Adsorbed-Secondary-Antibody-Polyclonal/A-11001">https://www.thermofisher.com/antibody/product/Goat-anti-Mouse-IgG-H-L-Cross-Adsorbed-Secondary-Antibody-Polyclonal/A-11001</a>                           |

### DNA/cDNA Clones

| Clone Name | Sequence | Source / Repository | Persistent ID / URL |
|------------|----------|---------------------|---------------------|
|            |          |                     |                     |
|            |          |                     |                     |
|            |          |                     |                     |

### Cultured Cells

| Name                                     | Vendor or Source                               | Sex (F, M, or unknown) | Persistent ID / URL                                                                                                                                                       |
|------------------------------------------|------------------------------------------------|------------------------|---------------------------------------------------------------------------------------------------------------------------------------------------------------------------|
| Human umbilical vein endothelial cells   | Cell Applications                              | Unknown                | <a href="https://www.cellapplications.com/human-umbilical-vein-endothelial-cells-huvec">https://www.cellapplications.com/human-umbilical-vein-endothelial-cells-huvec</a> |
| Human pulmonary artery endothelial cells | Pulmonary Hypertension Breakthrough Initiative | Unknown                | <a href="https://www.ipahresearch.org/services.html">https://www.ipahresearch.org/services.html</a>                                                                       |
|                                          |                                                |                        |                                                                                                                                                                           |

### Data & Code Availability

| Description | Source / Repository | Persistent ID / URL |
|-------------|---------------------|---------------------|
|             |                     |                     |
|             |                     |                     |
|             |                     |                     |

### Other

DOI [to be added]

| Description                                  | Source / Repository            | Persistent ID / URL                                                                                                                                                                                                                                                                                                                                   |
|----------------------------------------------|--------------------------------|-------------------------------------------------------------------------------------------------------------------------------------------------------------------------------------------------------------------------------------------------------------------------------------------------------------------------------------------------------|
| Endothelial Growth Medium-2                  | Lonza                          | <a href="https://bioscience.lonza.com/lonza_bs/US/en/Primary-and-Stem-Cells/p/000000000000185303/EGM-2-Endothelial-Cell-Growth-Medium-2-BulletKit">https://bioscience.lonza.com/lonza_bs/US/en/Primary-and-Stem-Cells/p/000000000000185303/EGM-2-Endothelial-Cell-Growth-Medium-2-BulletKit</a>                                                       |
| Fetal bovine serum                           | Hyclone                        | <a href="https://www.cytivalifesciences.com/en/us/shop/cell-culture-and-fermentation/sera/fetal-bovine-serum/hyclone-characterized-fetal-bovine-serum-fbs-u-s-origin-p-06336">https://www.cytivalifesciences.com/en/us/shop/cell-culture-and-fermentation/sera/fetal-bovine-serum/hyclone-characterized-fetal-bovine-serum-fbs-u-s-origin-p-06336</a> |
| Microvascular Endothelial Growth Medium-2    | Lonza                          | <a href="https://bioscience.lonza.com/lonza_bs/US/en/Primary-and-Stem-Cells/p/000000000000185321/EGM--2-MV-Microvascular-Endothelial-Cell-Growth-Medium-2-BulletKit">https://bioscience.lonza.com/lonza_bs/US/en/Primary-and-Stem-Cells/p/000000000000185321/EGM--2-MV-Microvascular-Endothelial-Cell-Growth-Medium-2-BulletKit</a>                   |
| Azaserine                                    | Cayman chemical                | <a href="https://www.caymanchem.com/product/14834/azaserine">https://www.caymanchem.com/product/14834/azaserine</a>                                                                                                                                                                                                                                   |
| 2-deoxy-D-glucose                            | Sigma                          | <a href="https://www.sigmaaldrich.com/US/en/product/sigma/d8375">https://www.sigmaaldrich.com/US/en/product/sigma/d8375</a>                                                                                                                                                                                                                           |
| eNOS siRNA                                   | ThermoFisher                   | <a href="https://www.thermofisher.com/order/genome-database/details/sirna/s9623?CID=&amp;ICID=&amp;subtype=sirna_silencer_select">https://www.thermofisher.com/order/genome-database/details/sirna/s9623?CID=&amp;ICID=&amp;subtype=sirna_silencer_select</a>                                                                                         |
| Silencer select negative control #1 siRNA    | ThermoFisher                   | <a href="https://www.thermofisher.com/order/catalog/product/4390843?SID=srch-hj-4390843#/4390843?SID=srch-hj-4390843">https://www.thermofisher.com/order/catalog/product/4390843?SID=srch-hj-4390843#/4390843?SID=srch-hj-4390843</a>                                                                                                                 |
| Silencer select GAPDH positive control siRNA | ThermoFisher                   | <a href="https://www.thermofisher.com/order/catalog/product/4390849?SID=srch-hj-4390849#/4390849?SID=srch-hj-4390849">https://www.thermofisher.com/order/catalog/product/4390849?SID=srch-hj-4390849#/4390849?SID=srch-hj-4390849</a>                                                                                                                 |
| OGA Activity                                 | BMR                            | <a href="http://www.bmrservice.com/OGAassay.html">http://www.bmrservice.com/OGAassay.html</a>                                                                                                                                                                                                                                                         |
| OGT activity                                 | Promega                        | <a href="https://www.promega.com/products/cell-signaling/signaling-pathway-assays/udp-glo-glycosyltransferase-assay/?catNum=V6961">https://www.promega.com/products/cell-signaling/signaling-pathway-assays/udp-glo-glycosyltransferase-assay/?catNum=V6961</a>                                                                                       |
| U- <sup>13</sup> C <sub>6</sub> -glucose     | Cambridge Isotope Laboratories | <a href="https://shop.isotope.com/productdetails.aspx?itemno=CLM-1396-PK">https://shop.isotope.com/productdetails.aspx?itemno=CLM-1396-PK</a>                                                                                                                                                                                                         |
